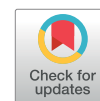

## Issues and Events

### 83rd SCIENTIFIC SESSIONS: CALL FOR ABSTRACTS

The 83rd annual American Diabetes Association Scientific Sessions will be held in San Diego, California, 23–26 June 2023, at the San Diego Convention Center. Abstract submission is open until Monday, 9 January 2023, at 5:00 P.M. EST. The committee encourages submissions that are innovative, challenge current treatment paradigms, and represent the latest advances in basic, clinical, and translational science. This is your opportunity to shape the scientific program and help ensure that the most relevant spectrum of topics is presented at the meeting. In addition, registration and housing will open in January 2023. For more information, please visit [professional.diabetes.org/scientific-sessions](http://professional.diabetes.org/scientific-sessions).

### CLINICAL DIABETES CME SERIES: OVERWEIGHT AND OBESITY MANAGEMENT FOR PRIMARY CARE CLINICIANS

In this short video series, an expert panel led by John Anderson, MD, discusses the burden of obesity, recommends approaches to facilitate communication and patient motivation, and describes evidence-based treatments. Panelists also discuss considerations for implementing these interventions in clinical practice. Each of the four videos are certified for 0.25 AMA PRA Category One Credit(s). Visit *Clinical Diabetes* to learn more.

### CLINICAL DIABETES CME SERIES: ANEMIA IN CHRONIC KIDNEY DISEASE

In this short video series moderated by editor-in-chief Stephen Brunton, diabetes care experts discuss approaches to identifying and managing and treating anemia in chronic kidney disease (CKD) in the primary care setting and review novel emerging agents to treat this condition. Each of the four videos are certified for 0.25 AMA PRA Category One Credit(s). Visit *Clinical Diabetes* to learn more.

### 2023 CLINICAL UPDATE CONFERENCE

The American Diabetes Association's 2023 Clinical Update Conference will be held at the Westin Tampa Waterside Hotel in Tampa, Florida, as well as virtually, 10–12 February 2023. The program will provide a first look at the 2023 Standards of Care. Other conference topics include Technology to Drive Better Diabetes Care and Overcoming Therapeutic Inertia. For registration details and more information, please visit

[professional.diabetes.org/meeting/local-continuing-education-activities/2023-clinical-update-conference](http://professional.diabetes.org/meeting/local-continuing-education-activities/2023-clinical-update-conference).

### COMPENDIUM AND SPECIAL PODCAST: DIABETES-RELATED EYE CARE

The American Diabetes Association's most recently published clinical compendium is a practical guide to diabetes-related eye care. The guide presents practical information to facilitate interprofessional collaboration, reduce barriers, and improve outcomes for people with diabetes-related retinal disease. This compendium is sponsored by VSP Vision Care and Regeneron, Visionary Partners in the American Diabetes Association's multiyear "Focus on Diabetes" eye health initiative ([diabetes.org/diabetes/eye-health/about-focus-on-diabetes](http://diabetes.org/diabetes/eye-health/about-focus-on-diabetes)). To access this and other clinical compendia for free, visit [professional.diabetes.org/monographs](http://professional.diabetes.org/monographs). To listen to the special companion podcast series led by Dr. Neil Skolnik, please visit [diabetesjournals.org/journals/pages/focus\\_on\\_diabetes\\_podcasts](http://diabetesjournals.org/journals/pages/focus_on_diabetes_podcasts).

### SPECIAL PODCAST: MANAGEMENT OF HYPERGLYCEMIA IN TYPE 2 DIABETES

A special episode of "Diabetes Core Update," the American Diabetes Association podcast for primary care clinicians, highlights the recent consensus report from the American Diabetes Association and the European Association for the Study of Diabetes on the management of hyperglycemia in type 2 diabetes ([doi.org/10.2337/dci22-0034](https://doi.org/10.2337/dci22-0034)). Dr. Neil Skolnik is joined by consensus report author Dr. Vanita Arora, who discusses the updates to the 2022 report and the key takeaways for managing and treating hyperglycemia in type 2 diabetes. For more information, please visit [diabetesjournals.org/journals/pages/diabetes-core-update-special-editions](http://diabetesjournals.org/journals/pages/diabetes-core-update-special-editions).

### DIABETES CARE ONLINE COLLECTIONS

*Diabetes Care* periodically publishes special article collections related to a specific topic, study, or aspect of diabetes care, prevention, and treatment. These collections appear in the print and online editions of *Diabetes Care*. Learn more about previously published collections at [diabetesjournals.org/journals/pages/diabetes\\_care\\_featured\\_collection](http://diabetesjournals.org/journals/pages/diabetes_care_featured_collection).

**Diabetes Care** (print ISSN 0149-5992, online ISSN 1935-5548) is owned, controlled, and published monthly by the American Diabetes Association, Inc., 2451 Crystal Drive, Suite 900, Arlington, VA 22202. *Diabetes Care* is a registered trademark of the American Diabetes Association. **Periodicals postage** paid at Arlington, VA, and additional mailing offices. **POSTMASTER:** Send all UAA to CFS (see DMM 507.1.5.2). **NON-POSTAL AND MILITARY FACILITIES:** Send address corrections to American Diabetes Association, Membership & Publication Operations, PO Box 37433, Boone, IA 50037-0433. Claims for missing issues should be made within 6 months of publication. The publisher expects to supply missing issues free of charge only when losses have been sustained in transit and when the reserve stock permits.
